# Supplementary material for: Mammals Preferred: Reassortment of Batai and Bunyamwera orthobunyavirus Occurs in Mammalian but Not Insect Cells
Source: MDPI journal article supplement (doi:10.3390/v13091702), 2021-08-27
Supplement: s1 [file s1]

**Supplementary Table S1:** Primer used for RT-PCR analysis of reassortant virus clones from co-infection experiments.

| Virus & Segment | Fragment length [bp] | Primer sequence                    |
|-----------------|----------------------|------------------------------------|
| BATV L-Segment  | 710                  | 5'-GATGGCGATTTCCTGATTAT-3' †       |
|                 |                      | 3'-TGACCCCAAGAGTTTCCTATTAT-5' †    |
| BATV M-Segment  | 875                  | 5'-TGGCCTAGCATATCACCTTTCAC-3'      |
|                 |                      | 3'-GTTCTTTGCCTTCTTATGCTTGCTATTG-5' |
| BATV S-Segment  | 633                  | 5'-TGCTAACACCAGCAGTACTT-3'         |
|                 |                      | 3'-AGCACTGCTTACATTTGTCT-5'         |
| BUNV L-Segment  | 1038                 | 5'-GACAGTATAATTAAAGGAGACC-3'       |
|                 |                      | 3'-GCTTATCAATTGAATTGCATAAG-5'      |
| BUNV M-Segment  | 745                  | 5'-GAAGAAGACTGCTGGAAAAAT-3'        |
|                 |                      | 3'-CCACCAGATCGGGTTAATTC-5'         |
| BUNV S-Segment  | 771                  | 5'-AATCGCTGTGCTATTAAATCC-3'        |
|                 |                      | 3'-CCCGATTAAAAATGCATCCC-5'         |

† BATV L-Segment primer based on Jöst et al. (2011)

**A) Co-Infection BHK-21 [1:1]**

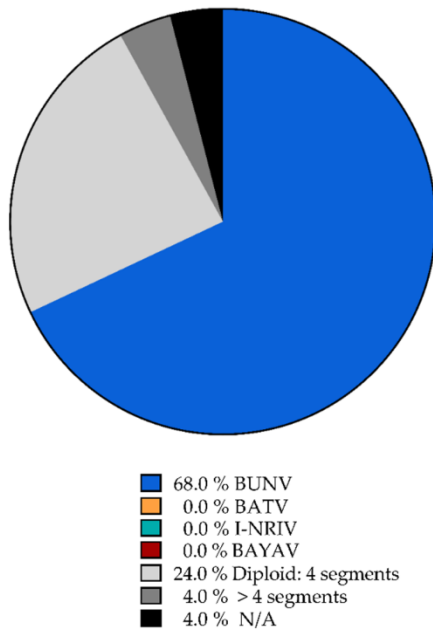

**B) Diploid: 4 segments BHK-21 [1:1]**

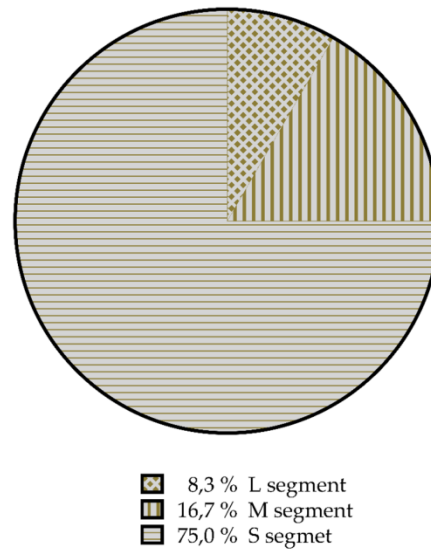

**C) Isolate BBB1.12 (BU;BU;BU/BA)**

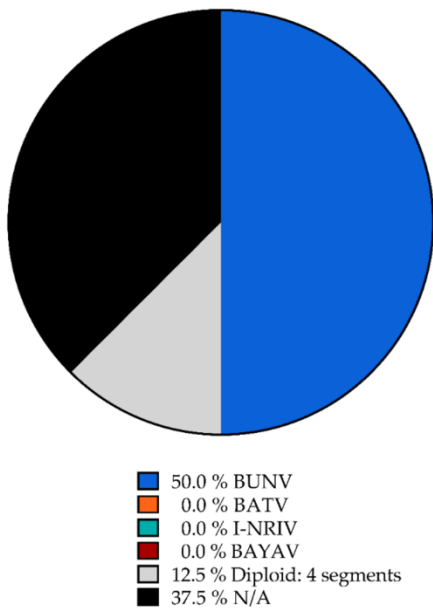

**D) Isolate BBB1.49 (BU;BU/BA;BU)**

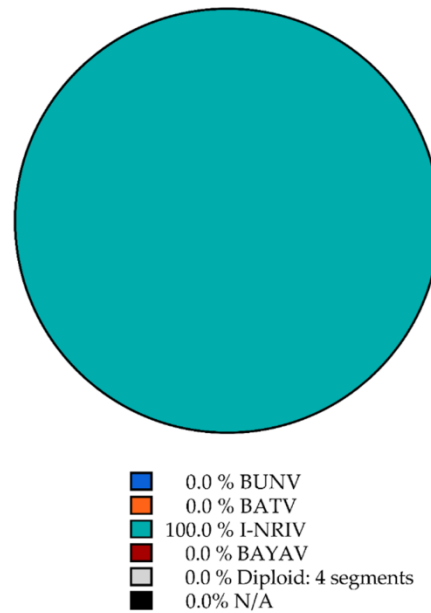

**Figure S1:** Pie charts representing the fraction of BUNV, BATV, Diploid viruses and reassortant viruses and viruses with less than 3 segments (N/A) from total number of analysed clones in the 1:1 infection. **(A)** results of the 1:1 BATV: BUNV infection in BHK-21 cells total n=50 **(B)** separated proportions of L, M and S-segment diploid viruses from the fraction diploid viruses in panel (A) n=12 **(C)** results of the second plaque purification performed with the clone BBB1.12 (S-segment diploid virus) n=8 and **(D)** results of the second plaque purification of the M-segment diploid virus clone BBB1.49

**Supplementary Table 2:** Viral growth kinetic in mammalian and insect cell lines. All values originate from three independent infection experiments of BATV, BUNV, I-NRIV and BAYAV in the named cell lines. The experiment number is given as kinetic # , Samples were taken just after infection (=T0) and 24 (=T1), 48 (=T2) and 72 (=T3) hours post infection. All values are given as plaque forming units per mL.

| cell line | virus  | kinetic # | T0      | T1      | T2      | T3      |
|-----------|--------|-----------|---------|---------|---------|---------|
| Aag2      | I-NRIV | 1         | 1,0E+00 | 1,0E+00 | 1,9E+00 | 3,9E+03 |
|           |        | 2         | 1,9E+00 | 6,9E+02 | 3,9E+03 | 3,9E+03 |
|           |        | 3         | 1,0E+00 | 1,9E+00 | 1,0E+00 | 1,2E+03 |
|           | BAYAV  | 1         | 2,2E+02 | 1,2E+02 | 1,2E+03 | 1,1E+01 |
|           |        | 2         | 1,0E+00 | 1,0E+00 | 1,0E+00 | 1,0E+00 |
|           |        | 3         | 1,0E+00 | 1,9E+00 | 3,9E+02 | 1,2E+04 |
|           | BATV   | 1         | 1,5E+00 | 2,9E+03 |         | 9,2E+04 |
|           |        | 2         | 3,5E+00 | 1,6E+04 |         | 2,2E+05 |
|           |        | 3         | 0,0E+00 | 5,2E+03 |         | 2,9E+04 |
|           | BUNV   | 1         | 8,2E+00 | 2,9E+04 |         | 5,2E+05 |
|           |        | 2         | 1,5E+00 | 5,2E+03 |         | 6,9E+05 |
|           |        | 3         | 2,9E+02 | 1,2E+04 |         | 9,2E+05 |
| C6/36     | I-NRIV | 1         | 1,0E+00 | 6,1E+00 | 2,2E+03 | 1,0E+00 |
|           |        | 2         | 1,0E+00 | 3,9E+03 | 2,2E+04 | 6,9E+05 |
|           |        | 3         | 1,0E+00 | 2,2E+02 | 2,2E+02 | 6,1E+00 |
|           | BAYAV  | 1         | 1,0E+00 | 3,9E+02 | 6,9E+03 | 1,0E+00 |
|           |        | 2         | 1,9E+00 | 3,9E+03 | 1,8E+04 | 6,1E+02 |
|           |        | 3         | 1,0E+00 | 1,9E+00 | 3,5E+00 | 1,0E+00 |
|           | BATV   | 1         | 9,2E+02 | 1,2E+06 |         | 1,2E+08 |
|           |        | 2         | 2,9E+02 | 2,2E+06 |         | 6,9E+07 |
|           |        | 3         | 5,2E+02 | 3,9E+06 |         | 6,9E+07 |
|           | BUNV   | 1         | 2,6E+00 | 6,9E+04 |         | 6,9E+06 |
|           |        | 2         | 4,6E+00 | 3,9E+05 |         | 6,9E+05 |
|           |        | 3         | 2,6E+00 | 2,9E+04 |         | 1,6E+07 |
| U4.4      | I-NRIV | 1         | 1,0E+00 | 1,0E+00 | 6,6E+03 | 2,2E+03 |
|           |        | 2         | 3,5E+00 | 6,1E+00 | 1,2E+04 | 2,2E+03 |
|           |        | 3         | 1,9E+00 | 3,5E+00 | 3,5E+00 | 2,2E+02 |
|           | BAYAV  | 1         | 1,9E+00 | 1,0E+00 | 3,5E+00 | 1,0E+00 |
|           |        | 2         | 1,0E+00 | 1,0E+00 | 1,0E+00 | 3,9E+01 |
|           |        | 3         | 1,0E+00 | 1,0E+00 | 1,0E+00 | 1,1E+01 |
|           | BATV   | 1         | 0,0E+00 | 2,9E+02 |         | 6,9E+04 |
|           |        | 2         | 1,5E+00 | 9,2E+06 |         | 8,2E+04 |
|           |        | 3         |         |         |         |         |

|       |        |   |         |         |         |         |
|-------|--------|---|---------|---------|---------|---------|
|       | BUNV   | 1 | 8,2E+00 | 2,9E+03 | 2,9E+04 |         |
|       |        | 2 | 8,2E+00 | 2,9E+04 | 2,9E+04 |         |
|       |        | 3 | 8,2E+00 | 2,9E+03 | 2,9E+04 |         |
| BHK21 | I-NRIV | 1 | 3,5E+00 | 1,6E+09 | 2,2E+10 | 5,2E+09 |
|       |        | 2 | 6,1E+00 | 2,2E+10 | 6,9E+09 | 1,2E+09 |
|       |        | 3 | 0,0E+00 | 6,9E+09 | 1,2E+09 | 3,9E+10 |
|       | BAYAV  | 1 | 2,6E+00 | 2,2E+07 | 2,2E+10 | 2,9E+10 |
|       |        | 2 | 5,2E+02 | 1,2E+10 | 2,2E+11 | 1,2E+09 |
|       |        | 3 | 1,9E+00 | 6,9E+06 | 6,9E+07 | 1,2E+10 |
|       | BATV   | 1 | 1,9E+00 | 1,2E+07 | 2,2E+07 | 3,9E+07 |
|       |        | 2 | 1,1E+00 | 6,9E+06 | 1,2E+06 | 2,2E+07 |
|       |        | 3 | 1,1E+00 | 3,9E+05 | 1,2E+06 | 3,9E+05 |
|       |        | 4 | 1,1E+00 | 3,9E+06 | 1,2E+07 | 1,2E+07 |
|       | BUNV   | 1 | 1,1E+00 | 6,9E+06 | 3,9E+07 | 1,2E+07 |
|       |        | 2 | 5,3E+00 | 6,9E+06 | 3,9E+07 | 3,9E+07 |
|       |        | 3 | 1,1E+00 | 1,2E+07 | 1,2E+07 | 6,9E+07 |
| Huh7  | I-NRIV | 1 | 4,6E+00 | 1,2E+07 | 9,2E+08 | 5,2E+06 |
|       |        | 2 | 1,6E+03 | 1,6E+09 | 1,2E+08 | 1,2E+07 |
|       |        | 3 | 3,5E+00 | 3,9E+06 | 2,2E+08 | 6,9E+07 |
|       | BAYAV  | 1 | 8,2E+00 | 6,9E+05 | 2,2E+10 | 6,9E+06 |
|       |        | 2 | 3,9E+02 | 5,2E+05 | 1,2E+10 | 2,2E+09 |
|       |        | 3 | 1,9E+00 | 1,2E+07 | 2,2E+10 | 6,9E+07 |
|       | BATV   | 1 | 1,9E+00 | 2,2E+05 | 1,2E+07 | 3,9E+07 |
|       |        | 2 | 1,1E+01 | 1,2E+06 | 6,9E+06 | 2,2E+06 |
|       |        | 3 | 1,1E+00 | 6,9E+04 | 1,2E+07 | 6,9E+06 |
|       | BUNV   | 1 | 1,1E+00 | 3,9E+05 | 6,9E+07 | 1,2E+08 |
|       |        | 2 | 1,1E+00 | 3,9E+06 | 1,2E+08 | 3,9E+06 |
|       |        | 3 | 1,1E+00 | 1,2E+03 | 3,9E+06 | 1,2E+07 |
| PT    | I-NRIV | 1 | 2,2E+00 | 1,8E+04 | 1,6E+09 | 3,9E+09 |
|       |        | 2 | 5,2E+02 | 2,2E+09 | 2,2E+08 | 3,9E+09 |
|       |        | 3 | 0,0E+00 | 1,9E+00 | 6,9E+07 | 1,2E+09 |
|       | BAYAV  | 1 | 4,6E+00 | 1,6E+04 | 9,2E+07 | 9,2E+08 |
|       |        | 2 | 9,2E+02 | 1,2E+08 | 6,9E+08 | 3,9E+09 |
|       |        | 3 | 1,0E+00 | 3,9E+04 | 1,2E+06 | 6,9E+07 |
|       | BATV   | 1 | 1,1E+00 | 9,2E+05 | 3,9E+07 | 1,6E+07 |
|       |        | 2 | 1,1E+00 | 3,9E+04 | 3,9E+06 | 3,9E+06 |
|       |        | 3 | 1,1E+00 | 1,2E+05 | 1,2E+06 | 2,2E+06 |
|       | BUNV   | 1 | 1,1E+00 | 3,9E+05 | 1,2E+08 | 9,2E+07 |
|       |        | 2 | 1,1E+00 | 2,2E+05 | 3,2E+07 | 3,9E+08 |
|       |        | 3 | 1,1E+00 | 2,2E+03 | 2,2E+06 | 2,2E+07 |
| SFT-R | I-NRIV | 1 | 4,6E+00 | 3,9E+07 | 2,2E+10 | 5,2E+09 |

|       |   |         |         |         |         |
|-------|---|---------|---------|---------|---------|
|       | 2 | 4,6E+00 | 1,6E+10 | 2,2E+08 | 3,9E+08 |
|       | 3 | 1,9E+00 | 3,9E+05 | 2,2E+08 | 2,2E+09 |
| BAYAV | 1 | 2,6E+00 | 9,2E+06 | 1,6E+09 | 3,9E+09 |
|       | 2 | 2,6E+00 | 6,9E+06 | 1,2E+09 | 3,9E+09 |
|       | 3 | 1,9E+00 | 2,2E+04 | 6,9E+07 | 2,2E+07 |
| BATV  | 1 | 1,9E+00 | 3,9E+04 | 3,9E+04 | 1,2E+05 |
|       | 2 | 1,1E+00 | 1,2E+04 | 2,2E+04 | 6,9E+04 |
|       | 3 | 1,1E+00 | 2,2E+03 | 1,2E+05 | 1,2E+06 |
| BUNV  | 1 | 1,1E+00 | 2,2E+04 | 3,9E+06 | 2,2E+07 |
|       | 2 | 1,1E+00 | 6,1E+00 | 3,9E+03 | 3,9E+03 |
|       | 3 | 1,9E+01 | 1,2E+05 | 3,9E+07 | 1,2E+07 |
|       | 4 | 1,1E+00 | 1,9E+01 | 1,9E+00 | 1,2E+03 |
|       | 5 | 1,1E+00 | 2,2E+03 | 1,2E+04 | 3,9E+03 |
